# Supplementary material for: HOPX hypermethylation promotes metastasis via activating SNAIL transcription in nasopharyngeal carcinoma
Source: PubMed Central journal article supplement (PMC5296651; doi:10.1038/ncomms14053), 2017-02-01

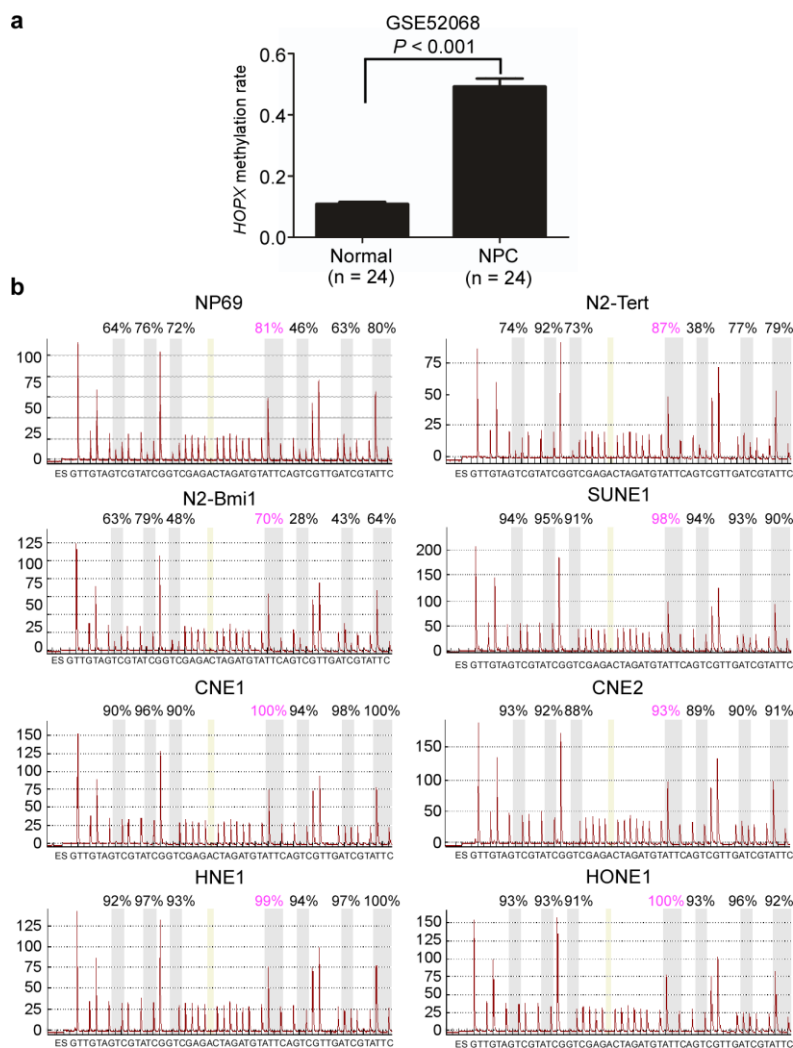

**Supplementary Figure 1. *HOPX* is hypermethylated in NPC.** (a) Methylation levels of *HOPX* in Normal (n = 24) and NPC (n = 24) tissues from the genome-wide methylation microarray data. Mean  $\pm$  s.d.; Student's *t*-tests. (b) Bisulfite pyrosequencing analysis of the *HOPX* promoter region in NPEC (NP69, N2-Tert and N2-Bmi1) and NPC (SUNE1, CNE1, CNE2, HNE1 and HONE1) cell lines. Magenta words: CG site of cg21899596. These data are representative of three independent experiments.

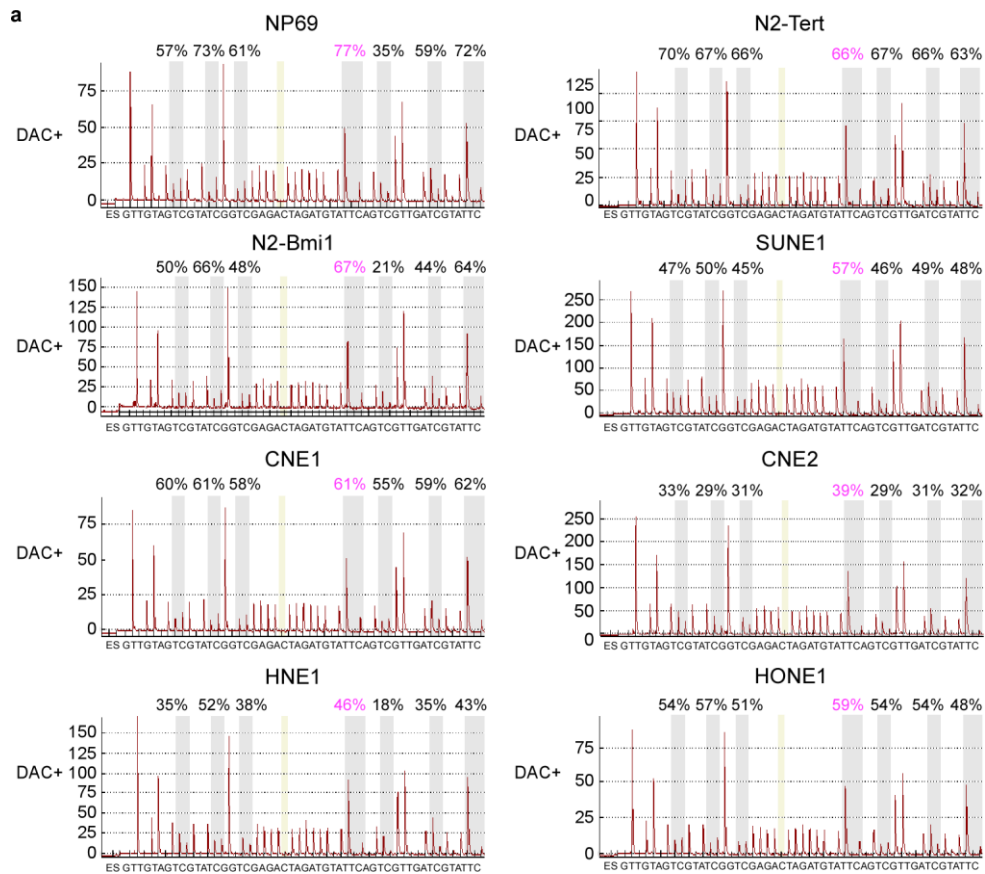

**Supplementary Figure 2. *HOPX* is hypermethylated in NPC cells.** (a) Bisulfite pyrosequencing analysis of the *HOPX* promoter region in NPEC (NP69, N2-Tert and N2-Bmi1) and NPC (SUNE1, CNE1, CNE2, HNE1 and HONE1) cell lines following treatment with DAC. Magenta words: CG site of cg21899596. These data are representative of three independent experiments.

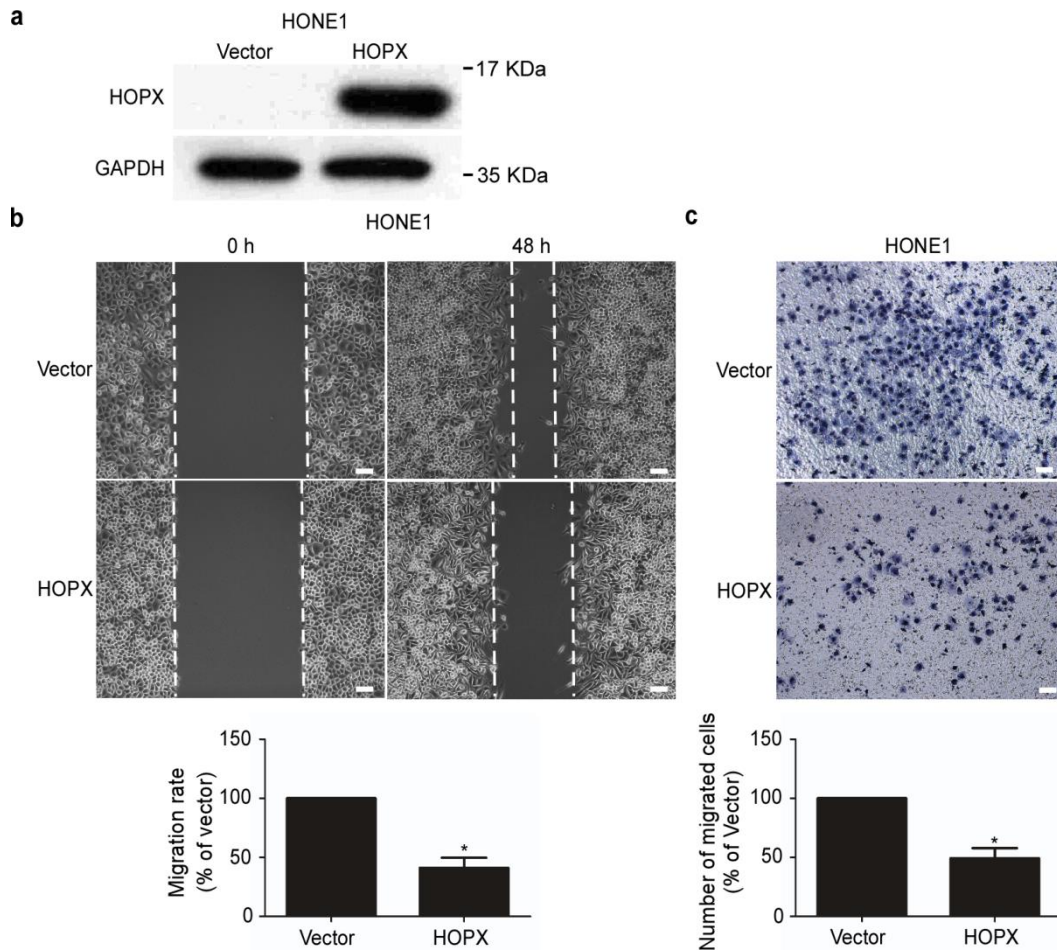

**Supplementary Figure 3. HOPX suppresses HONE1 cell migration *in vitro*.** (a) The ectopic expression of HOPX in HONE1 cells was confirmed by western blotting. (b,c) Migration ability was measured using a wound healing assay (200 ×) (b) and Transwell assay without Matrigel (200 ×) (c) in HONE1 cells with the vector or HOPX overexpression. Scale bar: 100 μm; Mean ± s.d.; \*,  $P < 0.01$  compared with vector; Student's  $t$ -tests. These data are representative of three independent experiments.

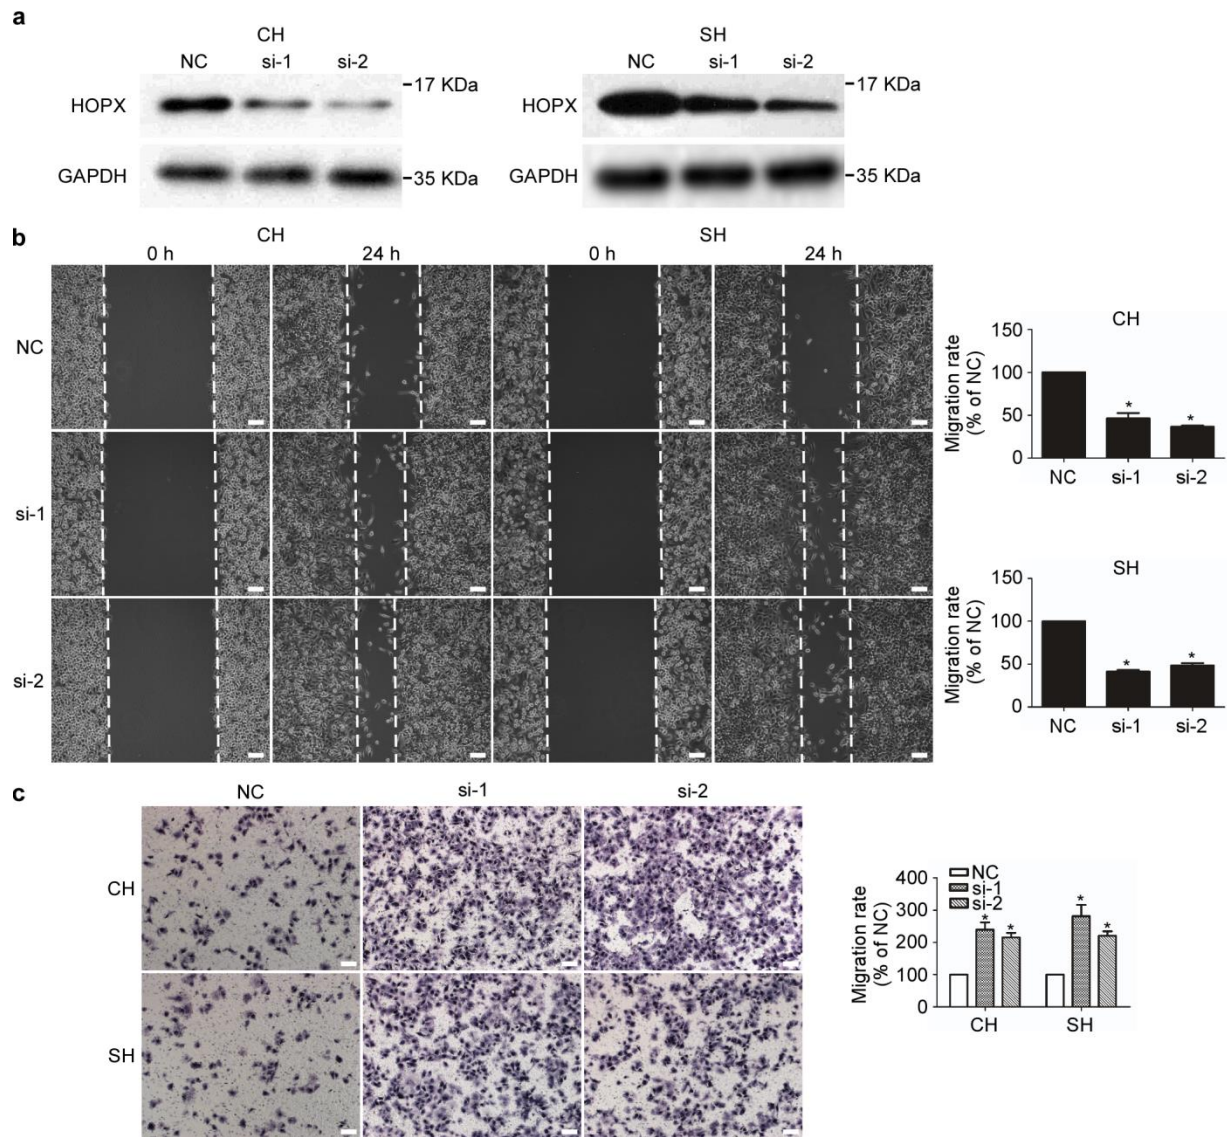

**Supplementary Figure 4. Silencing HOPX promotes NPC cell migration *in vitro*.** Control NC, or *HOPX*-siRNAs (si-1 and si-2) were used to knock down the expression of HOPX in CNE2 and SUNE1 cells with stable HOPX overexpression (CH and SH). **(a)** The silencing effects of HOPX in CH and SH cells were confirmed by western blotting. **(b,c)** Wound healing assay (200 ×) **(b)** and Transwell assay without Matrigel (200 ×) **(c)** were used to measure the migration abilities. Scale bar: 100 μm; mean ± s.d.; \*,  $P < 0.01$  compared with NC; Student's *t*-tests. These data are representative of three independent experiments.

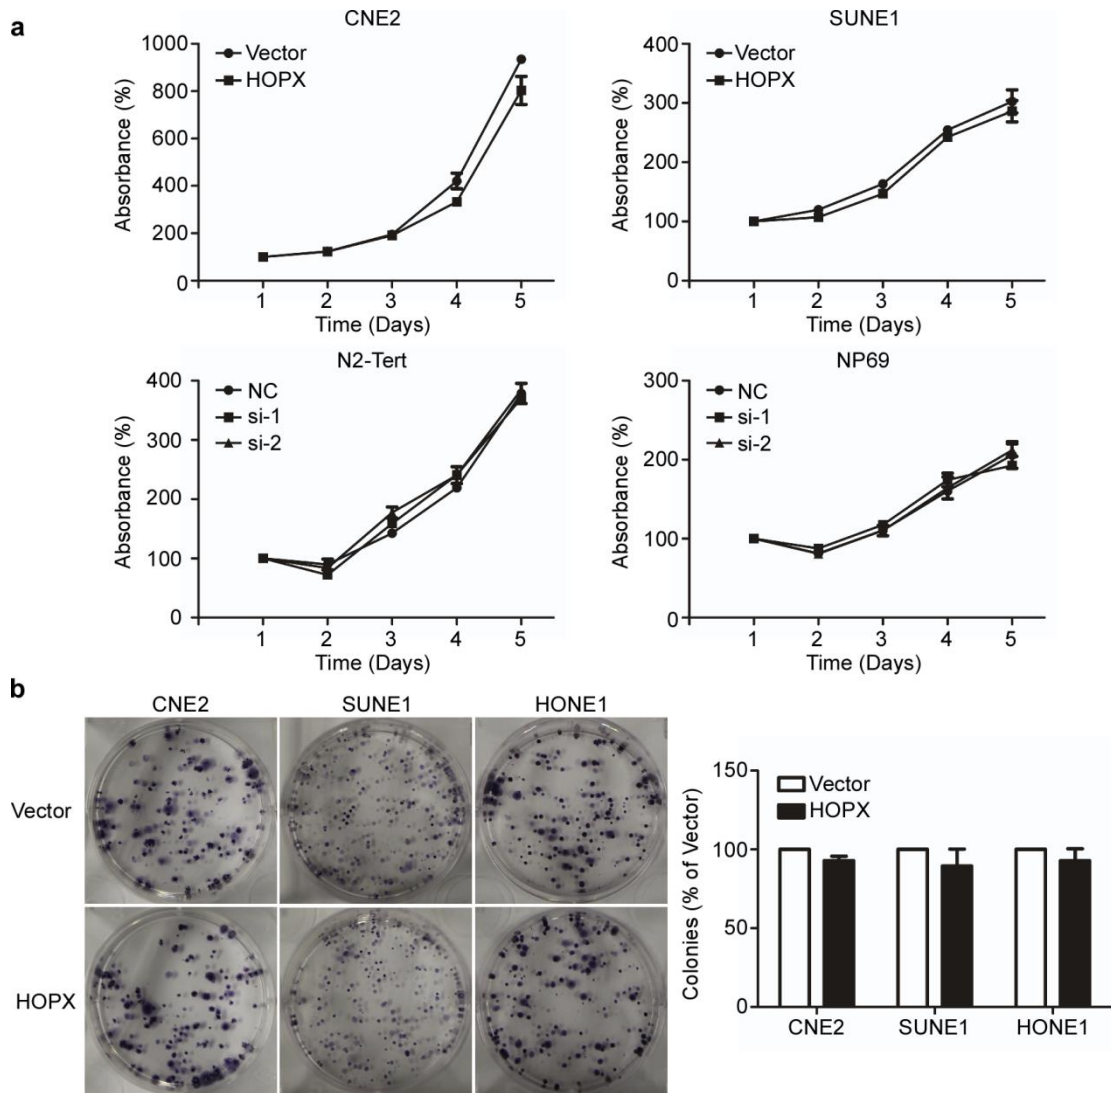

**Supplementary Figure 5. HOPX exhibits little effect on NPC cell proliferation *in vitro*.** (a) MTT assay was performed to examine the effect of HOPX on cell viability in CNE2 and SUNE1 cells stably overexpressed the vector or HOPX, or N2-Tert and NP69 cells transfected with the control NC or *HOPX*-siRNAs (si-1 and si-2). Mean  $\pm$  s.d.;  $P > 0.05$  compared with vector or NC; Student's *t*-tests. (b) Colony formation assay was used to examine the effect of HOPX on colonization in CNE2, SUNE1 and HONE1 cells with the vector or HOPX overexpression. Mean  $\pm$  s.d.;  $P > 0.05$  compared with vector; Student's *t*-tests. These data are representative of three independent experiments.



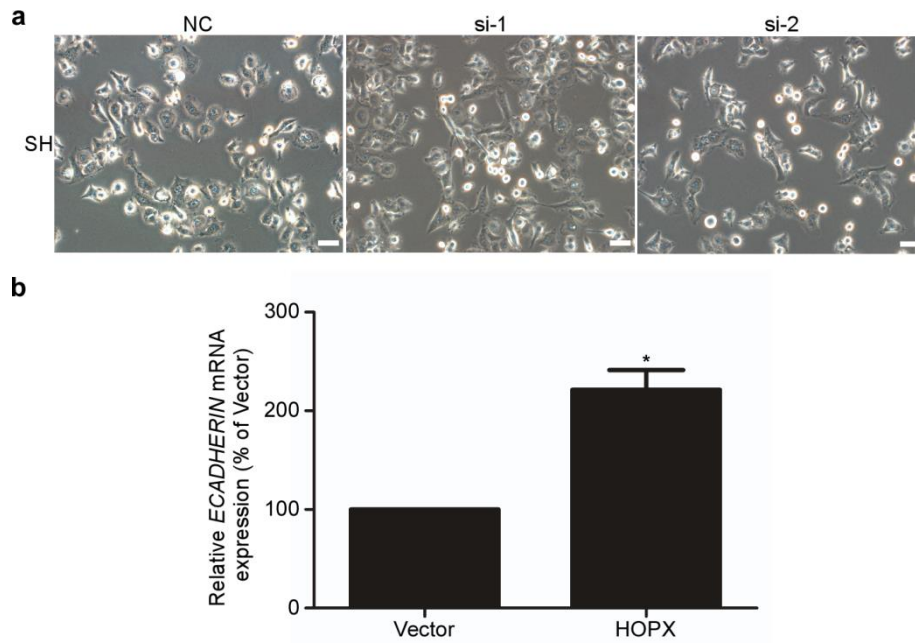

**Supplementary Figure 6. HOPX partially inhibits EMT in NPC cells.** (a) Phase contrast images (200 ×) of SH cells which were transfected with the control NC or *HOPX*-siRNAs (si-1 and si-2). SH cells indicated SUNE1 cells with *HOPX* overexpression. Scale bar: 100 μm. (b) The mRNA level of *ECADHERIN* was identified using a tumor metastasis PCR array in SUNE1 cells stably overexpressed the vector or *HOPX*. Mean ± s.d.; \*,  $P < 0.01$  compared with vector; Student's *t*-tests. These data are representative of three independent experiments.

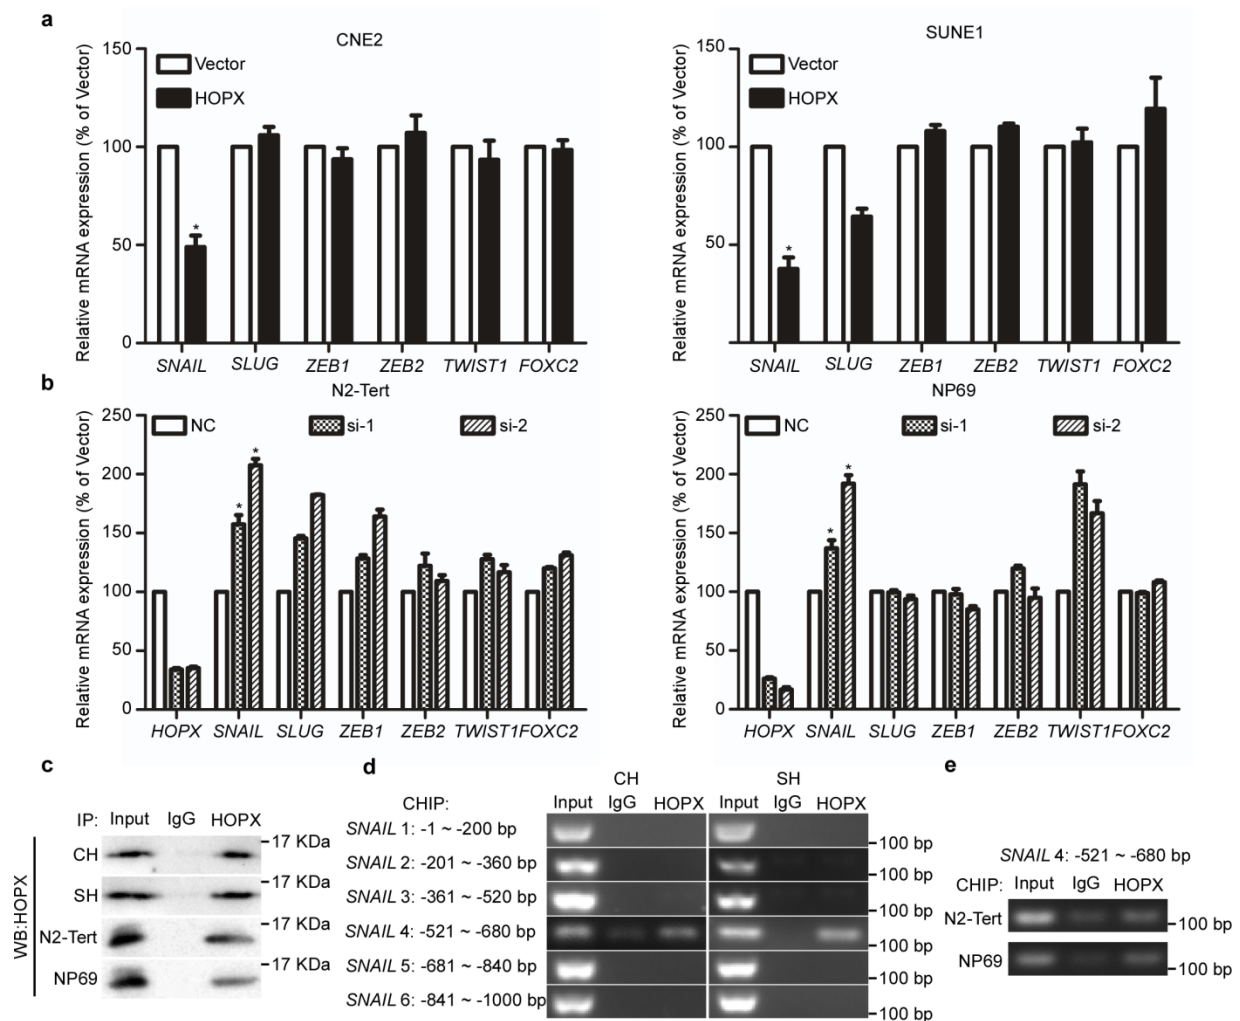

**Supplementary Figure 7. HOPX suppresses SNAIL expression in NPC.** (a,b) Real time RT-PCR was used to examine the mRNA level of EMT-TFs (*SNAIL*, *SLUG*, *ZEB1*, *ZEB2*, *TWIST1* and *FOXC2*) in CNE2 and SUNE1 cells stably overexpressed the vector or HOPX (a), or N2-Tert and NP69 cells transiently expressed control NC or HOPX-siRNAs (si-1 and si-2) (b). Mean  $\pm$  s.d.; \*,  $P < 0.01$  compared with vector or NC; Student's  $t$ -tests. (c) ChIP assay using an anti-HOPX antibody was performed to pull down HOPX. Western blotting (WB) was conducted to examine HOPX using an anti-HOPX Antibody. (d,e) ChIP-PCR assay was conducted to assess the enrichment of HOPX in the promoter regions of *SNAIL* in CH, SH, N2-Tert and NP69 cells. CH and SH cells indicated CNE2 and SUNE1 cells with HOPX exogenous expression. These data are representative of three independent experiments.

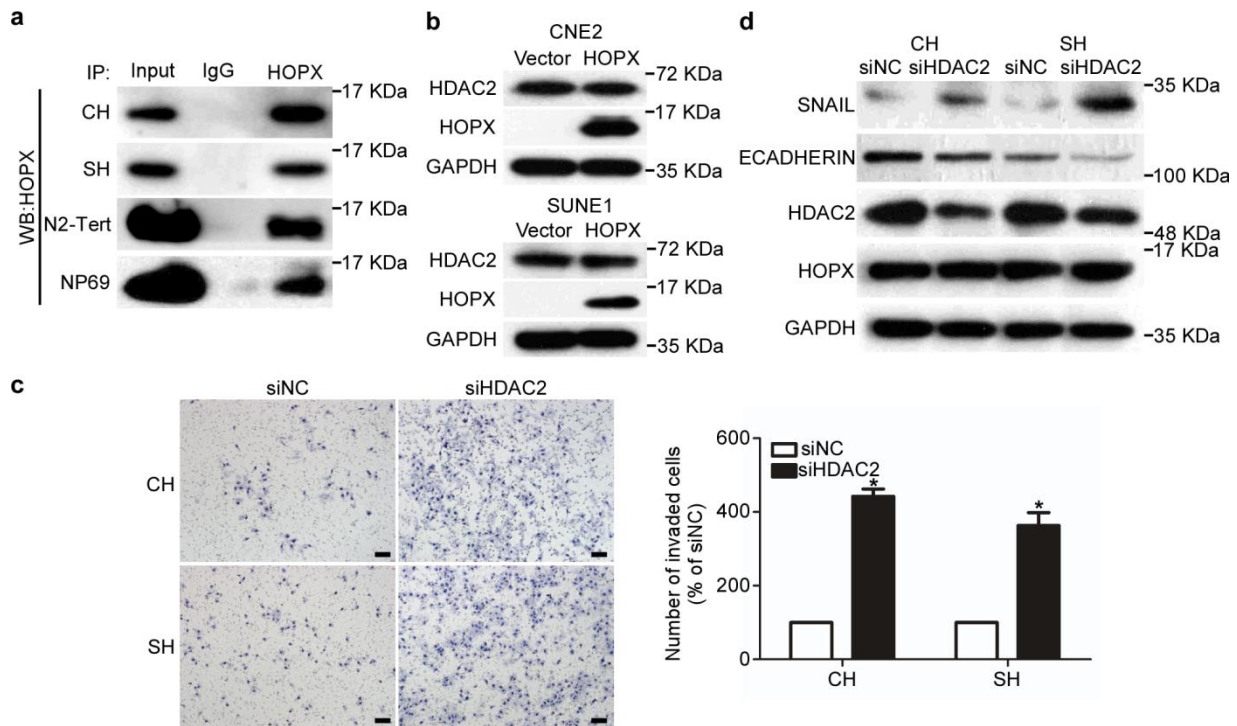

**Supplementary Figure 8. Silencing HDAC2 reverses the inhibitory effects of HOPX on invasiveness and EMT in NPC.** (a) IP assay using anti-HOPX antibody was performed to pull down HOPX. Western blotting (WB) was conducted to examine HOPX using an anti-HOPX Antibody. (b) Western blotting assay was used to assess the expression levels of HDAC2, HOPX and GAPDH. (c) Transwell assay with Matrigel (200  $\times$ ) was used to measure the invasive ability of CH and SH cells which were transfected with the control siNC or siHDAC2. Scale bar: 100  $\mu$ m; mean  $\pm$  s.d.; \*,  $P < 0.01$  compared with siNC; Student's  $t$ -tests. (d) Western blotting assay was used to examine the expression levels of SNAIL, ECADHERIN, HDAC2, HOPX and GAPDH in CH and SH cells which were transfected with the control siNC or siHDAC2. CH and SH cells indicated CNE2 and SUNE1 cells with HOPX exogenous expression. These data are representative of three independent experiments.



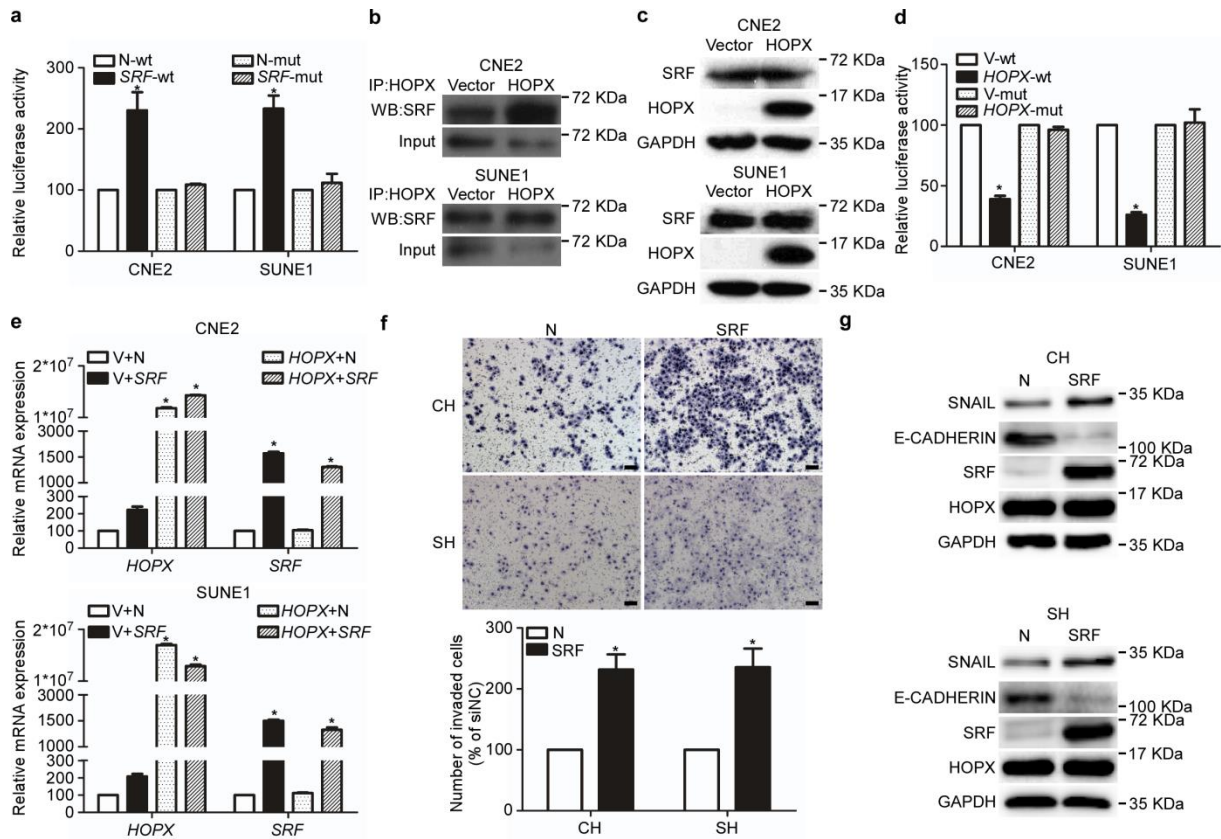

**Supplementary Figure 9. HOPX inhibits SRF-mediated *SNAIL* transcription in NPC.** (a) Wild type and mutant *SNAIL*-luciferase reporters were constructed and transfected with the control N or *SRF* construct in CNE2 and SUNE1 cells for 24 h. Luciferase reporter assay was used to detect the luciferase activity. Mean  $\pm$  s.d.; \*,  $P < 0.01$  compared with N-wt; Student's  $t$ -tests. (b) Co-IP assay was used to measure the interaction between HOPX and SRF in CNE2 and SUNE1 cells stably overexpressed the vector or HOPX. (c) Western blotting assay was used to assess the expression levels of SRF, HOPX and GAPDH. (d) Wild type and mutant *SNAIL*-luciferase reporters were constructed and transfected with the vector (V) or *HOPX* construct in CNE2 and SUNE1 cells for 24 h. Luciferase reporter assay was used to detect the luciferase activity. Mean  $\pm$  s.d.; \*,  $P < 0.01$  compared with V-wt; Student's  $t$ -tests. (e) CNE2 and SUNE1 cells were co-transfected with the *HOPX* and *SRF*. V and N were used as empty vectors of *HOPX* and *SRF*, respectively. Relative *SRF* and *HOPX* mRNA expressions were measured via real time RT-PCR. Mean  $\pm$  s.d.; \*,  $P < 0.01$  compared with V + N; Student's  $t$ -tests. (f) Transwell assay with Matrigel (200  $\times$ ) was used to measure the invasive ability of CH and SH cells which were transfected with the control N or *SRF* expression plasmids. Scale bar: 100  $\mu$ m; mean  $\pm$  s.d.; \*,  $P < 0.01$  compared with N; Student's  $t$ -tests. (g) Western blotting assay was used to examine the expression levels of *SNAIL*, *ECADHERIN*, *SRF*, *HOPX* and *GAPDH* in CH and SH cells which were transfected with the control N or *SRF* expression plasmids. CH and SH cells indicated CNE2 and SUNE1 cells with HOPX exogenous expression. These data are representative of three independent experiments.

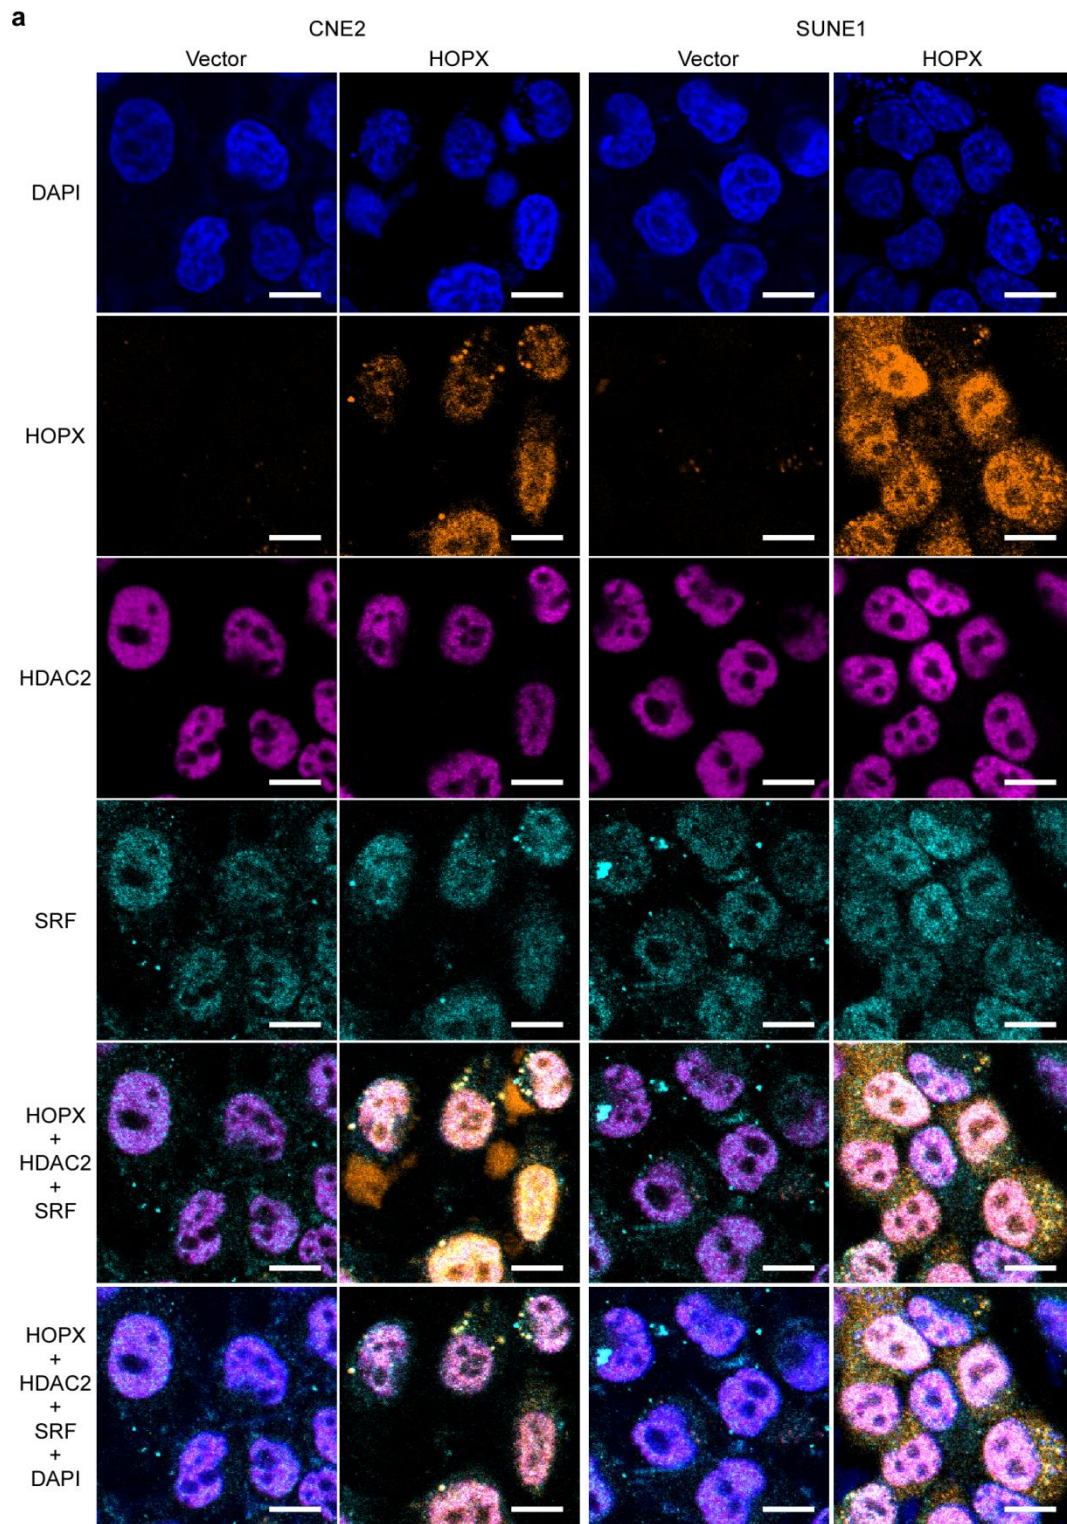

**Supplementary Figure 10. HOPX is co-localized with HDAC2 and SRF in NPC cells. (a)** Immunofluorescence images (600 ×) of HOPX (orange), HDAC2 (magenta) and SRF (cyan) expression in CNE2 and SUNE1 cells stably overexpressed the vector or HOPX. Scale bar: 100 μm. These data are representative of three independent experiments.

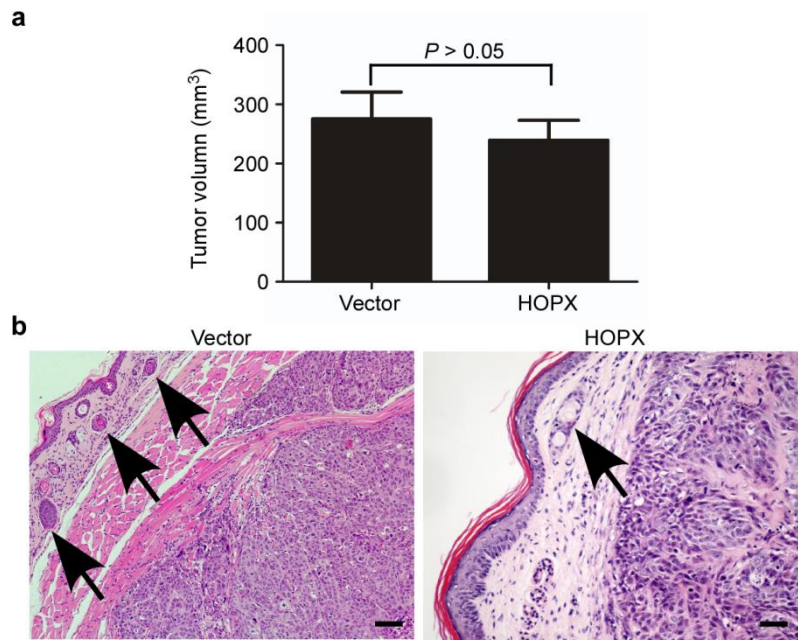

**Supplementary Figure 11. Restoring HOPX expression inhibits NPC cell aggressiveness *in vivo*.** (a) Quantification of the average volumes of the primary foot pad tumors. Mean  $\pm$  s.d.;  $P > 0.05$  compared with vector; Student's *t*-tests. (b) Representative images ( $200\times$ ) of the microscopic primary tumor in foot pad stained with H & E. Arrows represent lymphatic vessels. Scale bar:  $100\ \mu\text{m}$ . These data are representative of eight independent experiments (each mouse sample was considered as one independent experiment; three technological replications were repeated in each sample).

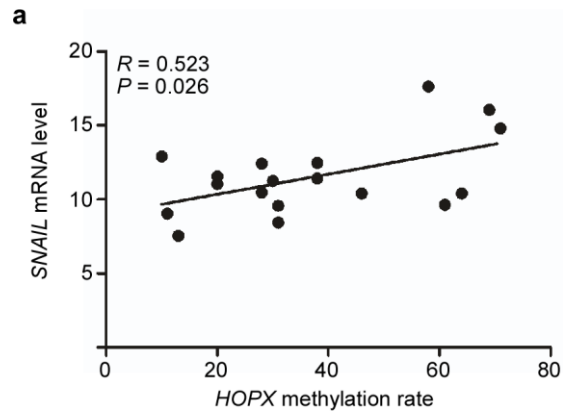

**Supplementary Figure 12. The methylation level of *HOPX* is positively associated with the *SNAIL* mRNA level in NPC. (a) *HOPX* methylation levels were determined via bisulfite pyrosequencing, while the *SNAIL* mRNA levels were determined via real time RT-PCR in NPC tissues (n = 24). Statistical analysis was performed using the Pearson's coefficient test. These data are representative of three independent experiments.**



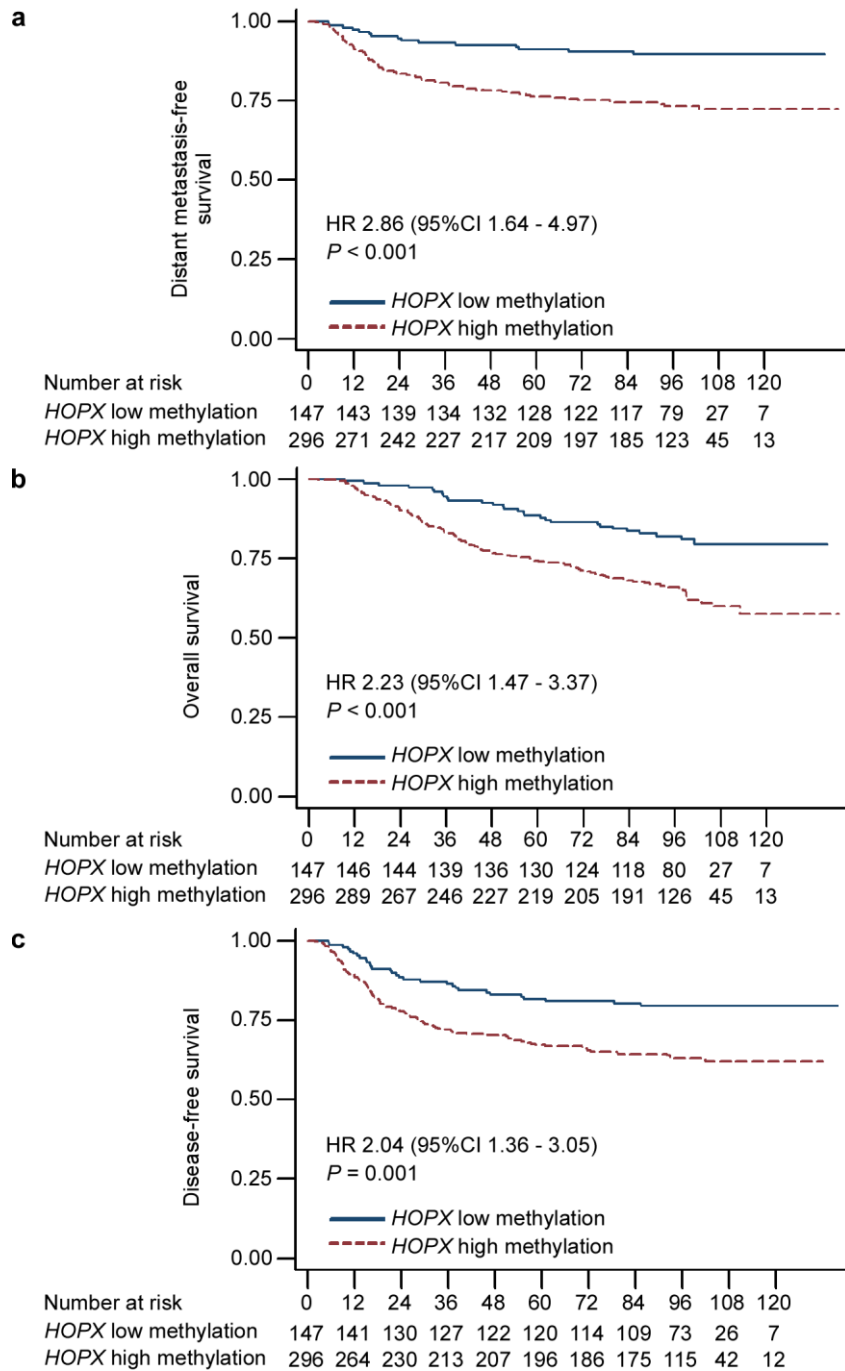

**Supplementary Figure 13. *HOPX* hypermethylation is associated with poor prognosis in the combined cohort of NPC.** All patients in the training and validation cohorts were combined (n = 443). (a-c) Kaplan-Meier analysis was performed to determine the DMFS (a), OS (b) and DFS (c) according to *HOPX* methylation levels (low methylation vs high methylation) in NPC patients. Adjusted univariate Cox proportional hazard models were used to calculate the HR values and *P* values.



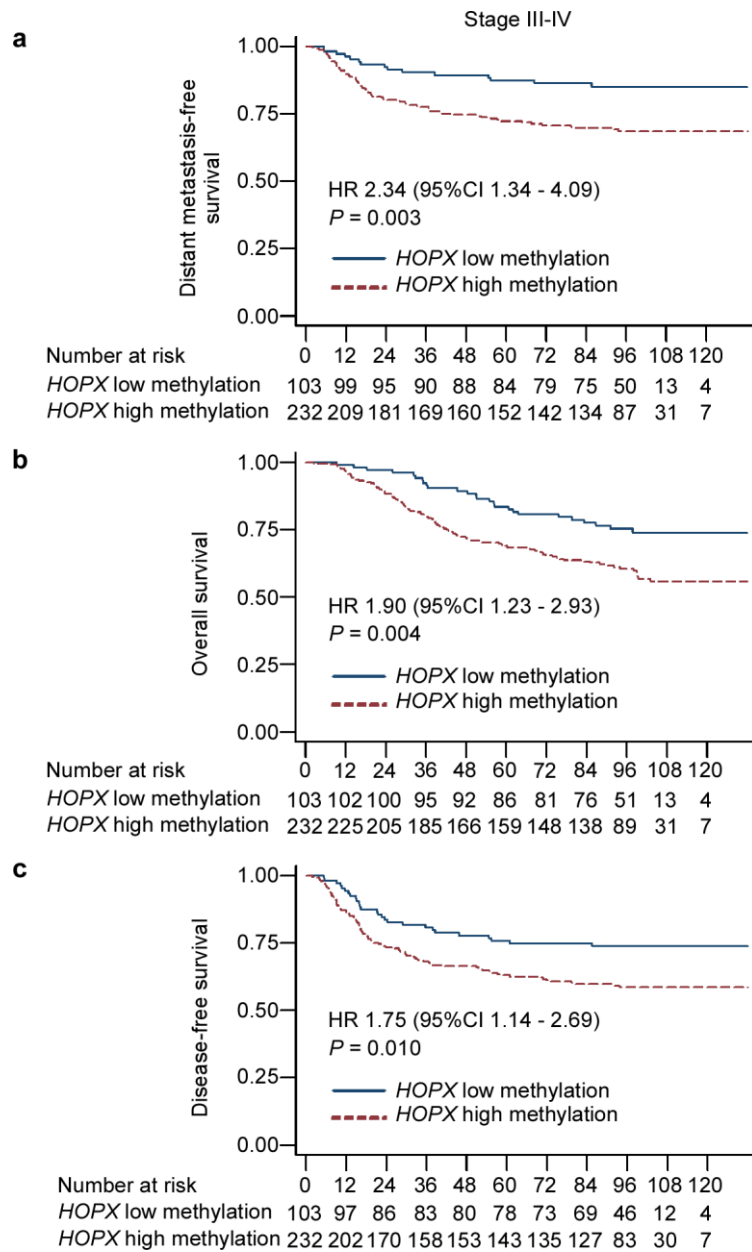

**Supplementary Figure 14. HOPX hypermethylation is associated with poor prognosis stratified by TNM stage. (a) DMFS, (b) OS and (c) DFS in NPC patients within TNM stage III-IV (n = 335). Adjusted univariate Cox proportional hazard models were used to calculate the HR values and P values.**

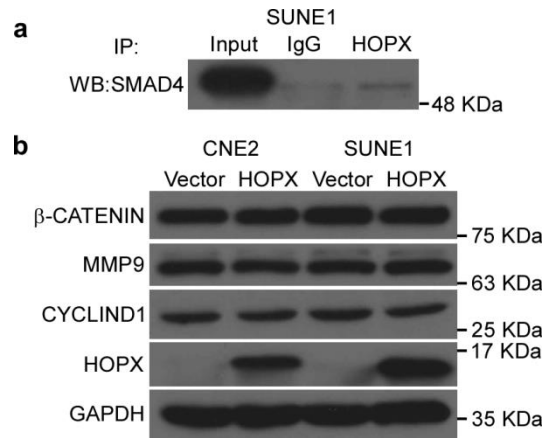

**Supplementary Figure 15. HOPX exhibits little effect on the WNT signaling pathway. (a)** Co-IP assay was used to measure the interaction between HOPX and SMAD4 in SUNE1 cells with stable HOPX overexpression. **(b)** Western blotting assay of HOPX,  $\beta$ -CATENIN, MMP9 and CYCLIND1 expression in CNE2 and SUNE1 cells with vector or HOPX overexpression. These data are representative of three independent experiments.

**Supplementary Table 1.** The top 10 differentially expressed genes between SUNE1 cells with HOPX or vector overexpression using tumor metastasis PCR array. *P* value is compared with the control using Student's *t*-tests; genes are ranked by *P* value. These data are representative of three independent experiments.

| Gene                    | Functional Gene Grouping                                                                        | Fold change        | P value            |
|-------------------------|-------------------------------------------------------------------------------------------------|--------------------|--------------------|
| <i>CXCL12</i>           | Cytokines                                                                                       | 3.26595684         | 0.000110047        |
| <i>IL1B</i>             | Cell Cycle Regulation;<br>Negative Regulation of Cell Proliferation;<br>Cytokines;<br>Apoptosis | 48.6101703         | 0.000908618        |
| <i>NME4</i>             | Other Genes Related to Metastasis                                                               | 37.14376425        | 0.001387345        |
| <i>MMP2</i>             | Matrix Metalloproteinases                                                                       | 21.40828154        | 0.001792716        |
| <i>EPHB2</i>            | Receptors                                                                                       | 3.133358068        | 0.002630822        |
| <i>SERPINE1</i>         | Other ECM Proteins                                                                              | 10.77413353        | 0.003052426        |
| <i>COL4A2</i>           | Other ECM Proteins                                                                              | 4.537641016        | 0.004445524        |
| <b><i>ECADHERIN</i></b> | <b>Cell to Cell Adhesion</b>                                                                    | <b>2.213765777</b> | <b>0.004685254</b> |
| <i>SYK</i>              | Cell to Cell Adhesion;<br>Other Genes Related to Growth                                         | 0.265441999        | 0.005936684        |
| <i>CD44</i>             | Cell to Cell Adhesion;<br>Transmembrane Receptors                                               | 3.385831498        | 0.006076176        |

**Supplementary Table 2.** Clinical characteristics of Nasopharyngeal Carcinoma patients according to the *HOPX* methylation level in the training and validation Cohorts.

| Characteristic      | Training Cohort (n = 255) |                       |                  | Validation Cohort (n = 188) |                       |                  |
|---------------------|---------------------------|-----------------------|------------------|-----------------------------|-----------------------|------------------|
|                     | Low                       | High                  | <i>P</i> value * | Low                         | High                  | <i>P</i> value * |
|                     | Methylation Group (%)     | Methylation Group (%) |                  | Methylation Group (%)       | Methylation Group (%) |                  |
|                     | n=70                      | n=185                 | n=77             | n=111                       |                       |                  |
| Age (mean ± S.D.)   |                           |                       |                  |                             |                       |                  |
| < 45                | 41 (58.6)                 | 93 (50.3)             | 0.236            | 35 (45.5)                   | 37 (33.3)             | 0.093            |
| ≥ 45                | 29 (41.4)                 | 92 (49.7)             |                  | 42 (54.5)                   | 74 (66.7)             |                  |
| Sex                 |                           |                       |                  |                             |                       |                  |
| Female              | 17 (24.3)                 | 52(28.1)              | 0.540            | 23 (29.9)                   | 29 (26.1)             | 0.573            |
| Male                | 53 (75.7)                 | 133(71.9)             |                  | 54 (70.1)                   | 82 (73.9)             |                  |
| WHO pathologic type |                           |                       |                  |                             |                       |                  |
| I + II              | 1 (1.4)                   | 5 (2.7)               | 0.475            | 8 (10.4)                    | 6 (5.4)               | 0.201            |
| III                 | 69 (98.6)                 | 180(97.3)             |                  | 69(89.6)                    | 105 (94.6)            |                  |
| VCA-IgG             |                           |                       |                  |                             |                       |                  |
| < 80                | 9 (12.9)                  | 20(10.8)              | 0.646            | 55 (71.4)                   | 65 (58.6)             | 0.071            |
| ≥ 80                | 61 (87.2)                 | 165(89.2)             |                  | 22 (28.6)                   | 46 (41.4)             |                  |
| EA-IgG              |                           |                       |                  |                             |                       |                  |
| < 10                | 16 (22.9)                 | 33(17.8)              | 0.364            | 24 (31.2)                   | 24 (21.6)             | 0.104            |
| ≥ 10                | 54 (77.2)                 | 152(82.2)             |                  | 53 (68.8)                   | 87 (78.4)             |                  |
| TNM Stage           |                           |                       |                  |                             |                       |                  |
| I-II                | 23 (32.9)                 | 38 (20.5)             | <b>0.040</b>     | 21(27.3)                    | 26 (23.4)             | 0.549            |
| III-IV              | 47 (67.1)                 | 147 (79.5)            |                  | 56 (72.7)                   | 85(76.6)              |                  |
| Relapses or deaths  |                           |                       |                  |                             |                       |                  |
| No                  | 57 (81.4)                 | 120 (64.9)            | <b>0.010</b>     | 60 (77.9)                   | 67 (60.4)             | <b>0.011</b>     |
| Yes                 | 13 (18.6)                 | 65 (35.1)             |                  | 17 (22.1)                   | 44 (39.6)             |                  |

Distant metastasis

|     |           |            |              |           |           |              |
|-----|-----------|------------|--------------|-----------|-----------|--------------|
| No  | 63 (90.0) | 137 (74.1) | <b>0.006</b> | 69 (89.6) | 82 (73.9) | <b>0.008</b> |
| Yes | 7 (10.0)  | 48 (25.9)  |              | 8 (10.4)  | 29 (26.1) |              |

Death

|     |           |            |              |           |           |              |
|-----|-----------|------------|--------------|-----------|-----------|--------------|
| No  | 56 (80.0) | 114 (61.6) | <b>0.011</b> | 63 (81.8) | 73 (65.8) | <b>0.016</b> |
| Yes | 14 (20.0) | 71 (38.4)  |              | 14 (18.2) | 38 (34.2) |              |

---

\* $\chi^2$  test or Fisher's exact test; TNM, tumor-node-metastasis; VCA-IgA, viral capsid antigen immunoglobulin A; EA-IgA, early antigen immunoglobulin A; All patients were restaged according to the 7<sup>th</sup> edition of the AJCC Cancer Staging Manual.



**Supplementary Table 3.** Univariate and multivariate Cox regression analysis of *HOPX* methylation level and survival.

| Variable                                | Univariate analysis |            |                | Multivariate analysis |            |                |
|-----------------------------------------|---------------------|------------|----------------|-----------------------|------------|----------------|
|                                         | HR                  | 95%CI      | <i>P</i> value | HR                    | 95%CI      | <i>P</i> value |
| <b>Distant metastasis-free survival</b> |                     |            |                |                       |            |                |
| <b>Training set</b>                     |                     |            |                |                       |            |                |
| <i>HOPX</i> methylation                 |                     |            |                |                       |            |                |
| (Low vs High)                           | 2.93                | 1.33-6.48  | <b>0.008</b>   | 2.44                  | 1.10-5.43  | <b>0.028</b>   |
| TNM stage (I-II vs III-IV)              | 6.43                | 2.01-20.59 | <b>0.002</b>   | 5.00                  | 1.55-16.10 | <b>0.007</b>   |
| Sex (Female vs Man)                     | 2.05                | 1.00-4.19  | 0.049          |                       |            |                |
| Age ( $\leq 45$ vs $> 45$ years)        | 3.09                | 1.72-5.53  | $<0.001$       | 2.60                  | 1.45-4.67  | 0.001          |
| WHO type (I + II vs III)                | 0.23                | 0.08-0.63  | 0.004          | 0.30                  | 0.11-0.86  | 0.025          |
| VCA-IgG ( $< 80$ vs $\geq 80$ )         | 2.46                | 0.77-7.88  | 0.129          |                       |            |                |
| EA-IgG ( $< 10$ vs $\geq 10$ )          | 1.76                | 0.80-3.90  | 0.161          |                       |            |                |
| <b>Validation set</b>                   |                     |            |                |                       |            |                |
| <i>HOPX</i> methylation                 |                     |            |                |                       |            |                |
| (Low vs High)                           | 2.82                | 1.29-6.17  | <b>0.009</b>   | 2.75                  | 1.26-6.03  | <b>0.011</b>   |
| TNM stage (I-II vs III-IV)              | 3.11                | 1.10-8.79  | <b>0.032</b>   | 3.02                  | 1.07-8.52  | <b>0.037</b>   |
| Sex (Female vs Man)                     | 1.72                | 0.75-3.91  | 0.198          |                       |            |                |
| Age ( $\leq 45$ vs $> 45$ years)        | 2.02                | 0.95-4.27  | 0.068          |                       |            |                |
| WHO type (I + II vs III)                | 1.41                | 0.34-5.85  | 0.639          |                       |            |                |
| VCA-IgG ( $< 80$ vs $\geq 80$ )         | 0.70                | 0.35-1.43  | 0.329          |                       |            |                |
| EA-IgG ( $< 10$ vs $\geq 10$ )          | 0.72                | 0.36-1.44  | 0.357          |                       |            |                |
| <b>Overall survival</b>                 |                     |            |                |                       |            |                |
| <b>Training set</b>                     |                     |            |                |                       |            |                |
| <i>HOPX</i> methylation                 |                     |            |                |                       |            |                |
| (Low vs High)                           | 2.25                | 1.27-3.99  | <b>0.006</b>   | 2.01                  | 1.13-3.57  | <b>0.018</b>   |
| TNM stage (I-II vs III-IV)              | 2.98                | 1.54-5.77  | <b>0.001</b>   | 2.50                  | 1.29-4.86  | <b>0.007</b>   |
| Sex (Female vs Man)                     | 1.95                | 1.12-3.42  | 0.019          | 1.87                  | 1.07-3.28  | 0.028          |

|                                  |      |           |              |      |           |              |
|----------------------------------|------|-----------|--------------|------|-----------|--------------|
| Age ( $\leq 45$ vs $> 45$ years) | 2.84 | 1.80-4.49 | <0.001       | 2.58 | 1.63-4.08 | <0.001       |
| WHO type (I + II vs III)         | 0.33 | 0.12-0.92 | 0.033        |      |           |              |
| VCA-IgG ( $< 80$ vs $\geq 80$ )  | 2.41 | 0.97-5.94 | 0.057        |      |           |              |
| EA-IgG ( $< 10$ vs $\geq 10$ )   | 1.64 | 0.89-3.02 | 0.112        |      |           |              |
| <b>Validation set</b>            |      |           |              |      |           |              |
| <i>HOPX</i> methylation          |      |           |              |      |           |              |
| (Low vs High)                    | 2.17 | 1.18-4.01 | <b>0.013</b> | 2.13 | 1.15-3.93 | <b>0.016</b> |
| TNM stage (I-II vs III-IV)       | 3.68 | 1.46-9.26 | <b>0.006</b> | 3.61 | 1.43-9.08 | <b>0.006</b> |
| Sex (Female vs Man)              | 1.34 | 0.70-2.55 | 0.379        |      |           |              |
| Age ( $\leq 45$ vs $> 45$ years) | 1.34 | 0.75-2.39 | 0.327        |      |           |              |
| WHO type (I + II vs III)         | 0.98 | 0.35-2.71 | 0.966        |      |           |              |
| VCA-IgG ( $< 80$ vs $\geq 80$ )  | 0.81 | 0.45-1.45 | 0.475        |      |           |              |
| EA-IgG ( $< 10$ vs $\geq 10$ )   | 0.97 | 0.53-1.79 | 0.924        |      |           |              |
| <b>Disease-free survival</b>     |      |           |              |      |           |              |
| <b>Training set</b>              |      |           |              |      |           |              |
| <i>HOPX</i> methylation          |      |           |              |      |           |              |
| (Low vs High)                    | 2.15 | 1.19-3.91 | <b>0.012</b> | 1.99 | 1.10-3.63 | <b>0.024</b> |
| TNM stage (I-II vs III-IV)       | 2.55 | 1.31-4.95 | <b>0.006</b> | 2.16 | 1.11-4.22 | <b>0.023</b> |
| Sex (Female vs Man)              | 1.68 | 0.96-2.96 | 0.070        |      |           |              |
| Age ( $\leq 45$ vs $> 45$ years) | 2.28 | 1.44-3.63 | <0.001       | 2.10 | 1.32-3.35 | 0.002        |
| WHO type (I + II vs III)         | 0.33 | 0.12-0.88 | 0.027        |      |           |              |
| VCA-IgG ( $< 80$ vs $\geq 80$ )  | 2.14 | 0.87-5.30 | 0.099        |      |           |              |
| EA-IgG ( $< 10$ vs $\geq 10$ )   | 1.30 | 0.72-2.36 | 0.386        |      |           |              |
| <b>Validation set</b>            |      |           |              |      |           |              |
| <i>HOPX</i> methylation          |      |           |              |      |           |              |
| (Low vs High)                    | 2.03 | 1.16-3.55 | <b>0.013</b> | 1.96 | 1.12-3.43 | <b>0.019</b> |
| TNM stage (I-II vs III-IV)       | 3.06 | 1.39-6.73 | <b>0.005</b> | 2.97 | 1.35-6.53 | <b>0.007</b> |
| Sex (Female vs Man)              | 1.49 | 0.81-2.75 | 0.202        |      |           |              |
| Age ( $\leq 45$ vs $> 45$ years) | 1.62 | 0.93-2.81 | 0.086        |      |           |              |

|                          |      |           |       |
|--------------------------|------|-----------|-------|
| WHO type (I + II vs III) | 1.63 | 0.51-5.19 | 0.411 |
| VCA-IgG (< 80 vs ≥ 80)   | 0.70 | 0.35-1.43 | 0.329 |
| EA-IgG (< 10 vs ≥ 10)    | 0.89 | 0.51-1.56 | 0.679 |

---

Adjusted multivariate Cox proportional hazard models were used to calculate the HR values and P values, including *HOPX* methylation level (low vs high), TNM stage (stage I-II vs III-IV), sex (female vs male), age (< 45 vs ≥ 45 years), WHO pathological type (I + II vs III), VCA-IgA (< 1:80 vs ≥ 1:80) and EA-IgA (< 1:10 vs ≥ 1:10). Variables which were significantly associated with survival are presented.

**Supplementary Table 4.** Multivariate Cox regression analysis of *HOPX* methylation level and survival in the combined cohort.

| Variable                                | HR   | 95%CI     | P value          |
|-----------------------------------------|------|-----------|------------------|
| <b>Distant metastasis-free survival</b> |      |           |                  |
| <i>HOPX</i> methylation (Low vs High)   | 2.52 | 1.45-4.38 | <b>0.001</b>     |
| TNM stage (I-II vs III-IV)              | 3.83 | 1.77-8.31 | <b>0.001</b>     |
| Age ( $\leq 45$ vs $> 45$ years)        | 2.30 | 1.45-3.65 | <b>&lt;0.001</b> |
| <b>Overall survival</b>                 |      |           |                  |
| <i>HOPX</i> methylation (Low vs High)   | 2.03 | 1.34-3.08 | <b>0.001</b>     |
| TNM stage (I-II vs III-IV)              | 2.80 | 1.64-4.81 | <b>&lt;0.001</b> |
| Age ( $\leq 45$ vs $> 45$ years)        | 1.95 | 1.36-2.80 | <b>&lt;0.001</b> |
| <b>Disease-free survival</b>            |      |           |                  |
| <i>HOPX</i> methylation (Low vs High)   | 1.84 | 1.23-2.77 | <b>0.003</b>     |
| TNM stage (I-II vs III-IV)              | 2.44 | 1.46-4.06 | <b>0.001</b>     |
| Age ( $\leq 45$ vs $> 45$ years)        | 1.85 | 1.29-2.63 | <b>0.001</b>     |

Adjusted multivariate Cox proportional hazard models were used to calculate the HR values and P values, including *HOPX* methylation level (low vs high), TNM stage (stage I-II vs III-IV), sex (female vs male), age ( $< 45$  vs  $\geq 45$  years), WHO pathological type (I + II vs III), VCA-IgA ( $< 1:80$  vs  $\geq 1:80$ ) and EA-IgA ( $< 1:10$  vs  $\geq 1:10$ ). Variables which were significantly associated with survival are presented.

**Supplementary Table 5.** Primers used in this study.

| Gene                            | Sequence (5' to 3')                 |
|---------------------------------|-------------------------------------|
| <b>BSP PCR primers</b>          |                                     |
| <i>HOPX</i> -F                  | GTTCTTAGGGATTTTTGTAGGAATTG          |
| <i>HOPX</i> -R                  | CTTCCTTCACTCCTTCCTTAAAAC (5'Biotin) |
| <b>BSP sequencing primer</b>    |                                     |
| <i>HOPX</i>                     | GGATTTTTGTAGGAATTGTAT               |
| <b>Real time RT-PCR primers</b> |                                     |
| <i>HOPX</i> -F                  | CACCACGCTGTGCCTCAT                  |
| <i>HOPX</i> -R                  | CCATTTCTGGGTCTCCTCC                 |
| <i>SNAIL</i> -F                 | TAATCCAGAGTTTACCTTCCAGC             |
| <i>SNAIL</i> -R                 | CTCATCTGACAGGGAGGTCAG               |
| <i>SLUG</i> -F                  | CCCTGAAGATGCATATTCGGA               |
| <i>SLUG</i> -R                  | CTGCAAATGCTCTGTTGCAG                |
| <i>ZEB1</i> -F                  | TCACTAGTGTTTACCAGAACAGTG            |
| <i>ZEB1</i> -R                  | GAACACTGTTCTGGTCAGCA                |
| <i>ZEB2</i> -F                  | CTACAAGCGCTTGACATCAC                |
| <i>ZEB2</i> -R                  | TAGCATTTGGTGCTGATCTGTC              |
| <i>TWIST1</i> -F                | AGTCTTACGAGGAGCTGCAG                |
| <i>TWIST1</i> -R                | CTCTGGAGGACCTGGTAGAG                |
| <i>FOXC2</i> -F                 | CTTCTACCGGGAGAACAAGC                |
| <i>FOXC2</i> -R                 | CTCCTTCTCCTTGGACACGT                |
| <i>ECADHERIN</i> -F             | GAAGAGGACCAGGACTTTGAC               |
| <i>ECADHERIN</i> -R             | GTAGTCATAGTCCTGGTCTTTGTC            |
| <i>α-CATENIN</i> -F             | CCTGAGGAGTTGGATGACTC                |
| <i>α-CATENIN</i> -R             | TCCTTTACCTCGGGTAAAGTC               |



|                      |                        |
|----------------------|------------------------|
| <i>VIMENTIN-F</i>    | ATTCCACTTTGCGTTCAAGG   |
| <i>VIMENTIN-R</i>    | CTTCAGAGAGAGGAAGCCGA   |
| <i>FIBRONECTIN-F</i> | CACGATGATATGGAGAGCCA   |
| <i>FIBRONECTIN-R</i> | TATTTGGTGGCCACCATAAGTC |
| <i>SRF-F</i>         | CACCATCATGACGTCATCCG   |
| <i>SRF-R</i>         | CTATCACAGCCATCTGGTGG   |

#### **siRNA sequences**

|            |                             |
|------------|-----------------------------|
| siRNA-NC-F | 5'-UUCUCCGAACGUGUCACGUTT-3' |
| siRNA-NC-R | 5'-ACGUGACACGUUCGGAGAATT-3' |
| siHOPX-1-F | 5'-GAAGCUAUGUGUAUCUUCUTT-3' |
| siHOPX-1-R | 5'-AGAAGAUACACAUAGCUUCTT-3' |
| siHOPX-2-F | 5'-CCCUAAGUCACUUUCCUUATT-3' |
| siHOPX-2-R | 5'-UAAGGAAAGUGACUUAGGGTT-3' |

#### **ChIP-PCR primers**

|                  |                            |
|------------------|----------------------------|
| <i>SNAIL-1-F</i> | AGGAGTCCCCGCCCCGGGCTCTCACC |
| <i>SNAIL-1-R</i> | GCAGCAGCGCCGCCAACTCCCTTAA  |
| <i>SNAIL-2-F</i> | GGGGCGTCAGAAGCGCTCAGACCAC  |
| <i>SNAIL-2-R</i> | GTTCGCTGGCGCAGCGCGGGTCGTC  |
| <i>SNAIL-3-F</i> | GTGTCCCTTTCTCGCTTCCTC      |
| <i>SNAIL-3-R</i> | CGGGACACCTGACCTTCCGAC      |
| <i>SNAIL-4-F</i> | TTCTGTCCGGGGCTGTGCCCTG     |
| <i>SNAIL-4-R</i> | CGCACGTGGCTCTCGGCGGCTTG    |
| <i>SNAIL-5-F</i> | AGTCACCCCGACCCCTGTCAG      |
| <i>SNAIL-5-R</i> | CACTCAGAGCCTCTCCCGAAG      |
| <i>SNAIL-6-F</i> | TCCAAACTCCTACGAGGCCCTG     |
| <i>SNAIL-6-R</i> | TCCCAGAGGAAGTGAAGAATTA     |

---

**Supplementary Table 6.** Antibodies used in this study.

| Antibody                    | Company     | Catalog no. | Dilution |
|-----------------------------|-------------|-------------|----------|
| <b>Western blotting</b>     |             |             |          |
| GAPDH                       | Santa Cruz  | sc-25778    | 1:1000   |
| HOPX                        | Santa Cruz  | SC-30216    | 1:200    |
| ECADHERIN                   | BD          | 610181      | 1:2000   |
| $\alpha$ -CATENIN           | BD          | 610193      | 1:500    |
| VIMENTIN                    | Proteintech | 10366-1-AP  | 1:1000   |
| FIBRONECTIN                 | Proteintech | 156131-AP   | 1:500    |
| SNAIL                       | Abcam       | ab180714    | 1:1000   |
| SRF                         | Proteintech | 16821-1-AP  | 1:800    |
| HDAC2                       | Proteintech | 12922-3-AP  | 1:1000   |
| SMAD4                       | Proteintech | 10231-1-AP  | 1:200    |
| $\beta$ -CATENIN            | Proteintech | 51067-2-AP  | 1:500    |
| CYCLIND1                    | Proteintech | 60186-1-Ig  | 1:500    |
| MMP9                        | Proteintech | 10375-2-AP  | 1:500    |
| Mouse                       | CST         | 7076        | 1:5000   |
| Rabbit                      | CST         | 7074        | 1:5000   |
| <b>Immunohistochemistry</b> |             |             |          |
| HOPX                        | Santa Cruz  | SC-30216    | 1:100    |
| SNAIL                       | Abcam       | ab180714    | 1:200    |
| <b>Immunofluorescence</b>   |             |             |          |
| SRF                         | Proteintech | 16821-1-AP  | 1:100    |
| HDAC2                       | Santa Cruz  | SC-6296     | 1:100    |
| HOPX                        | Santa Cruz  | SC-30216    | 1:100    |
| ECADHERIN                   | BD          | 610181      | 1:100    |
| $\alpha$ -CATENIN           | BD          | 610193      | 1:100    |

|                                                              |             |            |        |
|--------------------------------------------------------------|-------------|------------|--------|
| VIMENTIN                                                     | Proteintech | 10366-1-AP | 1:100  |
| goat Anti-rabbit, Alexa Fluor®<br>594 IgG secondary antibody | Life        | A-11008    | 1:1000 |
| goat Anti-mouse, Alexa Fluor®<br>594 IgG secondary antibody  | Life        | A-11001    | 1:1000 |
| rabbit Anti-goat, Alexa Fluor®<br>647 IgG secondary antibody | Life        | A-27018    | 1:1000 |

### **Co-Immunoprecipitation**

|       |             |            |     |
|-------|-------------|------------|-----|
| HOPX  | Santa Cruz  | SC-30216   | 3µg |
| SRF   | Proteintech | 16821-1-AP | 3µg |
| HDAC2 | Proteintech | 12922-3-AP | 3µg |
| IgG   | Proteintech | 30000-0-AP | 3µg |

### **Chromatin Immunoprecipitation**

|        |            |           |                                                  |
|--------|------------|-----------|--------------------------------------------------|
| HOPX   | Santa Cruz | SC-30216  | 2.0 ml per 0.5 ml Protein<br>A/G sepharose beads |
| HDAC2  | Abcam      | ab7029    | 0.5mg per 5ml Protein<br>A/G sepharose beads     |
| H3K9Ac | Abcam      | ab10812   | 0.2mg per 2ml Protein<br>A/G sepharose beads     |
| SRF    | CST        | 5147      | 1:100                                            |
| IgG    | Sigma      | SLBJ3775V | 1:100                                            |

---

**Supplementary Figure 16.** Full unedited western blotting gels for all figures.

Full unedited gel for Figure 2e

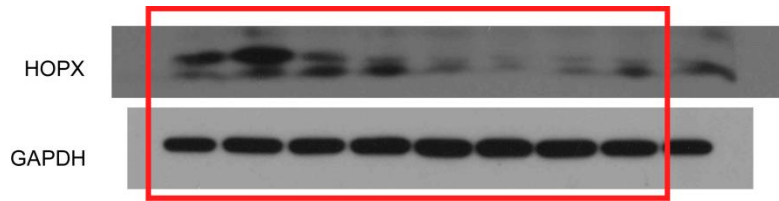

Full unedited gel for Figure 4d,e

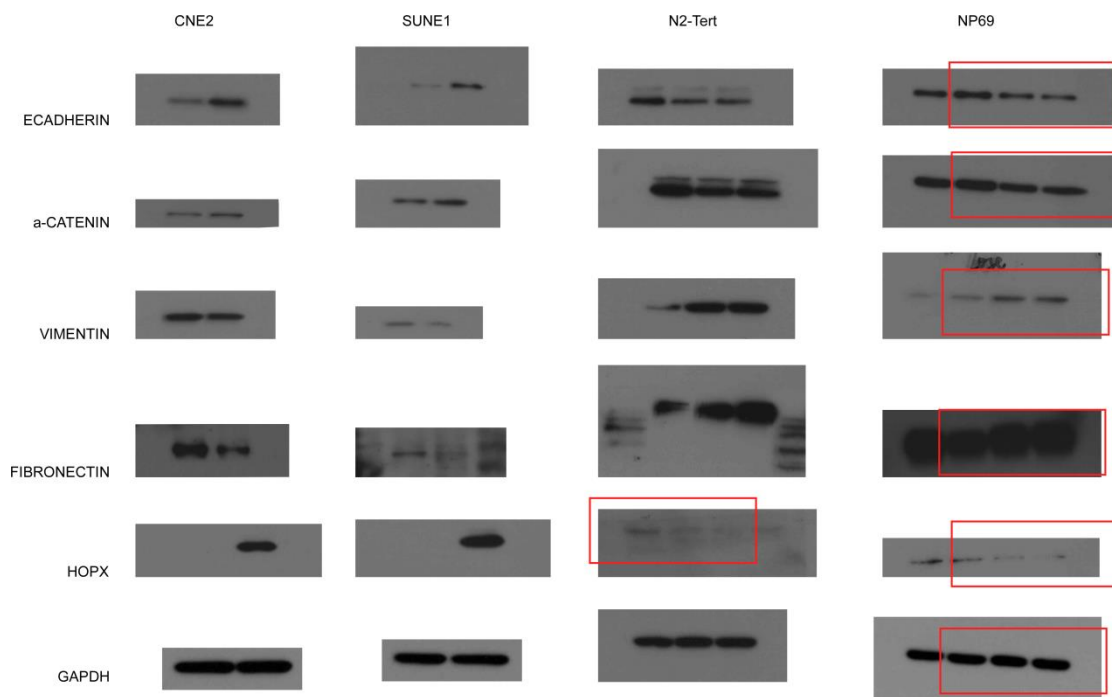

Full unedited gel for Figure 5c, d and g

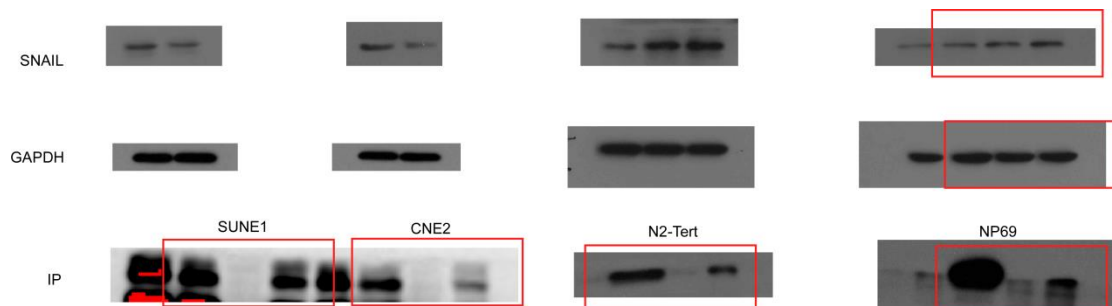

Full unedited gel for Figure 6c

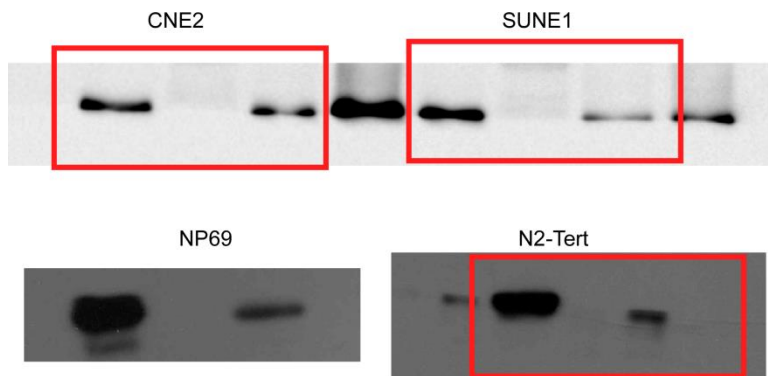

Full unedited gel for Figure 7d

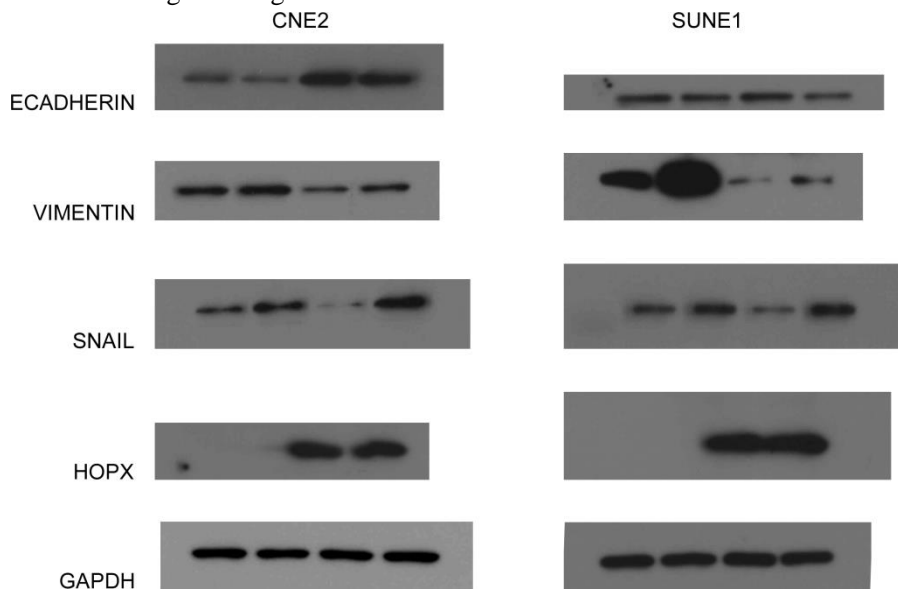

Full unedited gel for Supplementary Figure 3a

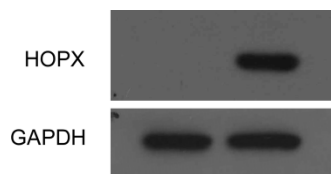

Full unedited gel for Supplementary Figure 4a

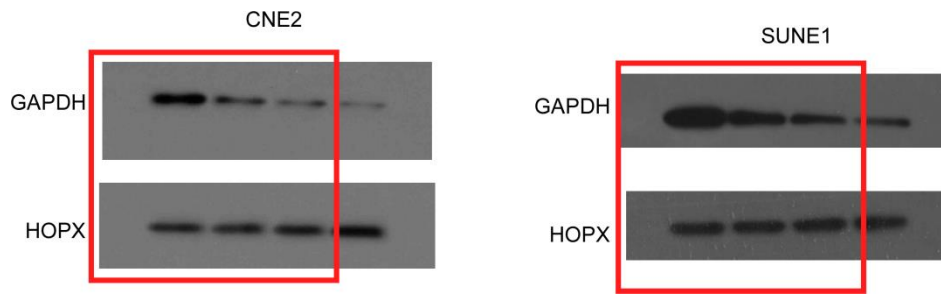

Full unedited gel for Supplementary Figure 7c

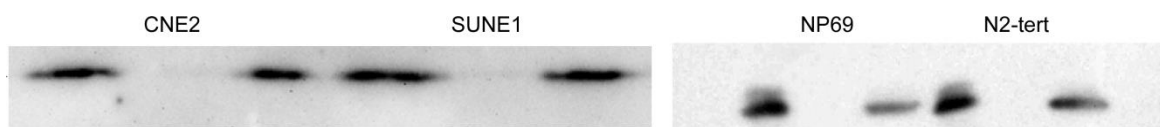

Full unedited gel for Supplementary Figure 8a,b,d

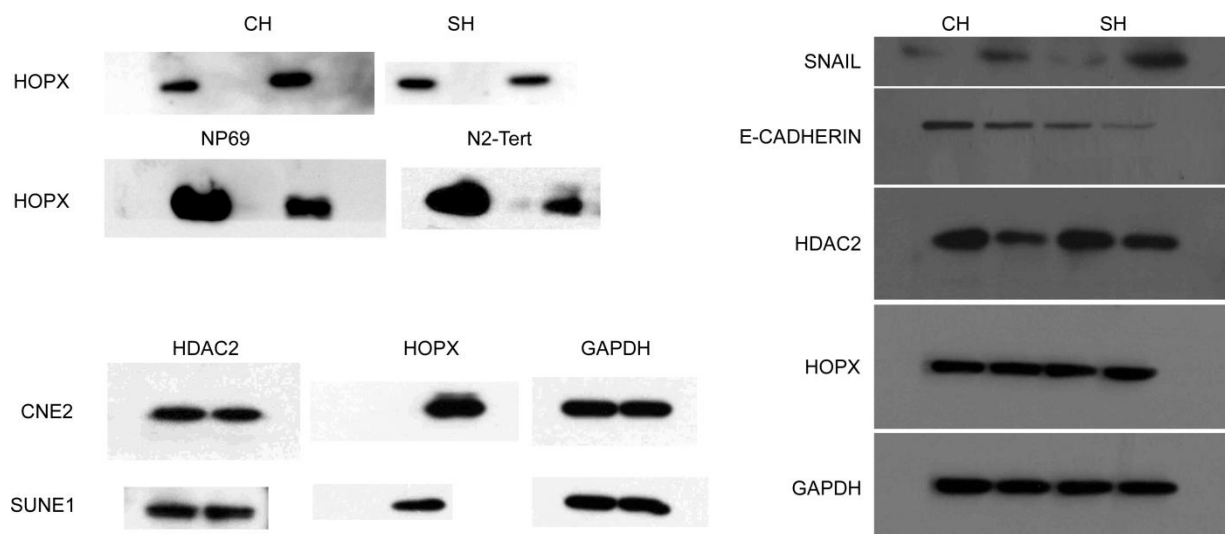

Full unedited gel for Supplementary Figure 9b,c,g

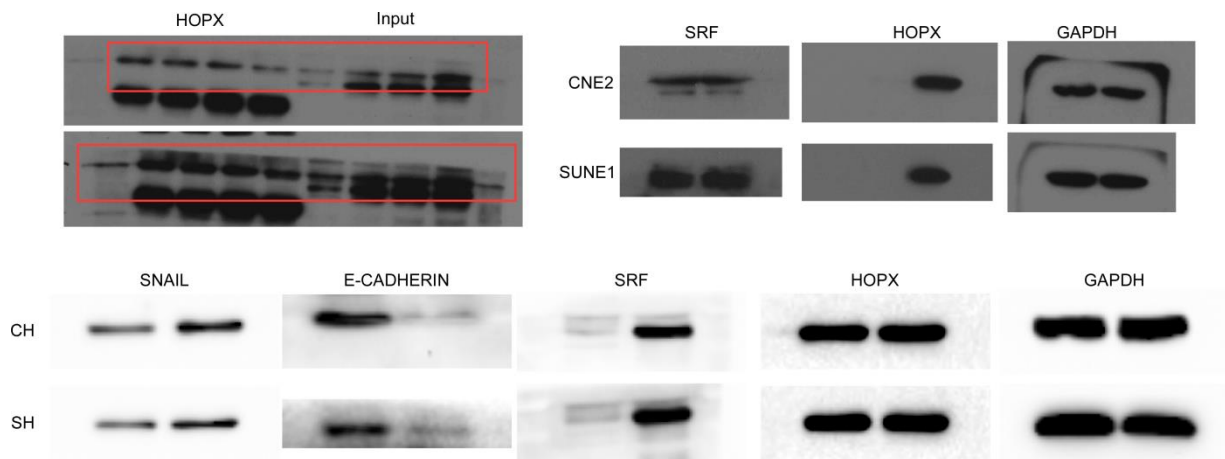

Full unedited gel for Supplementary Figure 15

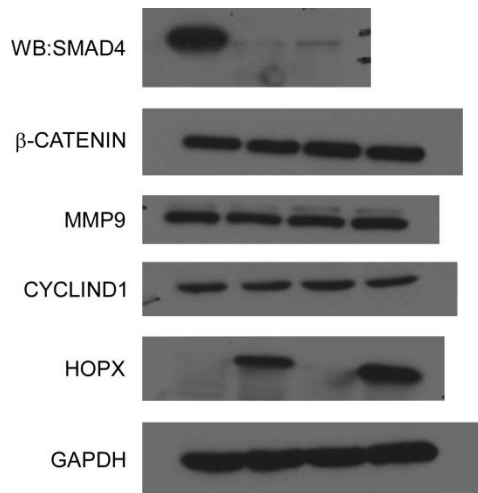

Supplement: ncomms14053-s1.pdf [file ncomms14053-s1.pdf]
